# Supplementary material for: Electrospun zinc oxide nanofibers for direct selective electrochemical detection of biological compounds
Source: Royal Society of Chemistry journal article supplement (doi:10.1039/c4ra13507e), 2014-12-09
Supplement: c4ra13507e1.pdf [file c4ra13507e1.pdf]

# **Electrospun zinc oxide nanofibers for direct selective electrochemical detection of biological compounds**

**Majid Arvand\* and Sepideh Tajyani**

*Electroanalytical Chemistry Laboratory, Faculty of Science, University of Guilan, Namjoo Street, P.O. Box: 1914, Rasht, Iran*

\*Corresponding author. Tel.: +98131 3233262, fax: +98 131 3233262

*E-mail address:* [arvand@guilan.ac.ir](mailto:arvand@guilan.ac.ir) (M. Arvand)

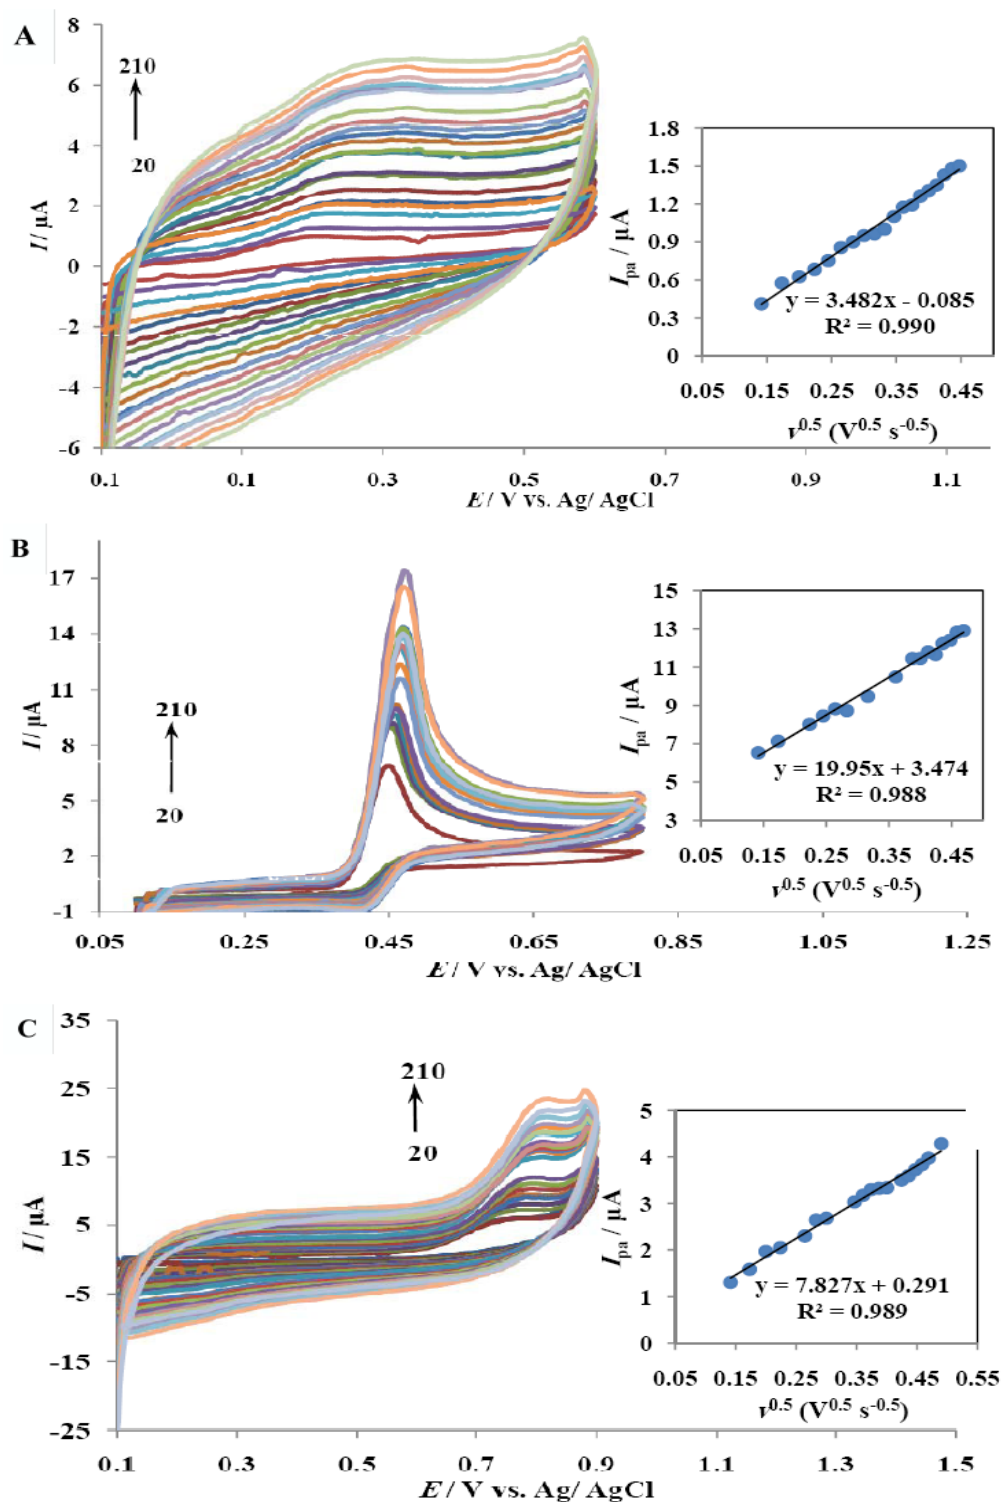

**Fig. S1** Cyclic voltammetry curves of ZNFs/CPE in  $6 \times 10^{-5}$  M AA (A),  $6 \times 10^{-5}$  M UA (B) and  $2 \times 10^{-4}$  M FA (C) at different scan rates (20–210  $\text{mV s}^{-1}$ ), separately. Insets: Observed dependence of peak current on square root of scan rate ( $v^{1/2}$ ).

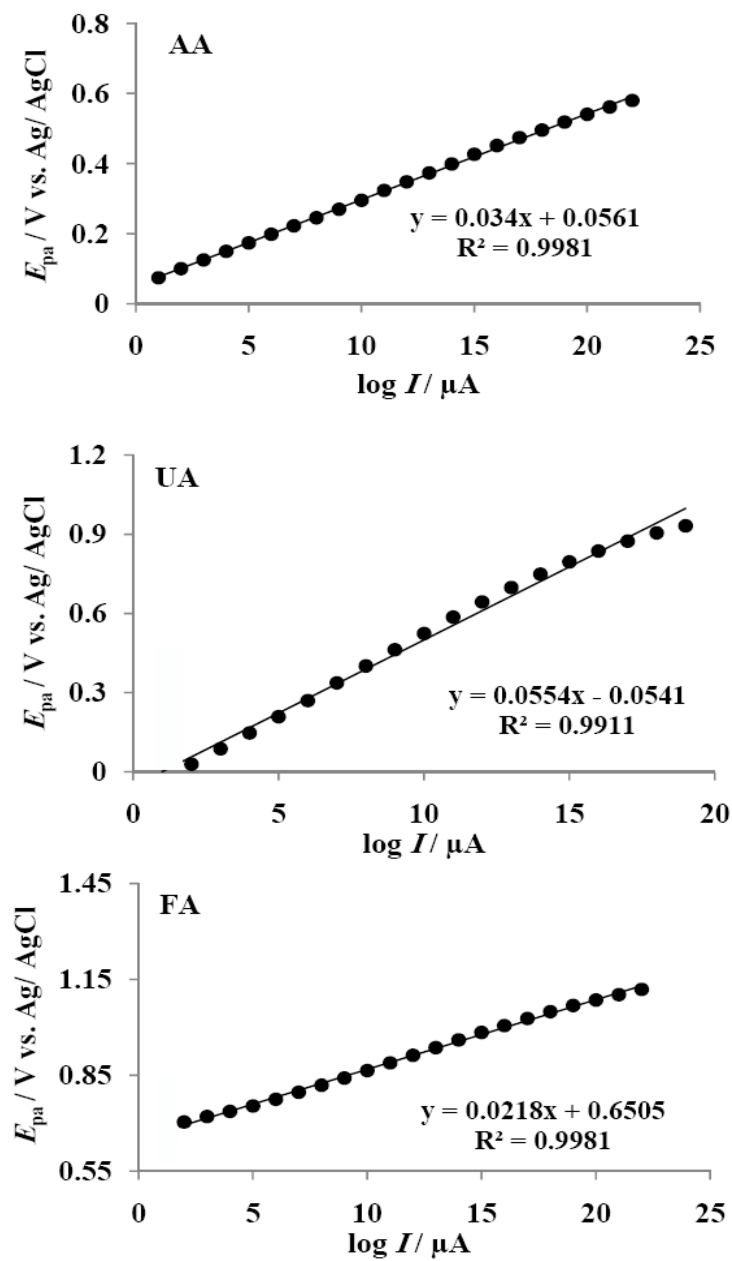

**Fig. S2** Tafel plots derived from the rising part of the voltammograms recorded at a scan rate of  $0.01 \text{ V s}^{-1}$  for AA, UA and FA.
